# Supplementary material for: Valorization of discarded industrial fish processing wastes for the extraction of gelatin to use as biodegradable fish bait matrix using RSM
Source: PeerJ journal article supplement (doi:10.7717/peerj-matsci.14), 2021-03-23
Supplement: ANOVA_Statistics_-_RSM_II_-Melting_point.pdf [file ANOVA_Statistics_-_RSM_II_-Melting_point.pdf]

**Warning:** The Cubic model is aliased.

## Fit Summary

### Response 1: Melting point

| Source    | Sequential p-value | Lack of Fit p-value | Adjusted R <sup>2</sup> | Predicted R <sup>2</sup> |           |
|-----------|--------------------|---------------------|-------------------------|--------------------------|-----------|
| Linear    | 0.0530             | 0.0059              | 0.3330                  | -0.0956                  |           |
| 2FI       | 0.8298             | 0.0044              | 0.2629                  | -1.0433                  |           |
| Quadratic | 0.0025             | 0.0566              | 0.8296                  | 0.1564                   | Suggested |
| Cubic     | 0.0220             | 0.4087              | 0.9481                  | 0.5339                   | Aliased   |

# Sequential Model Sum of Squares [Type I]

| Source             | Sum of Squares | df | Mean Square | F-value | p-value |           |
|--------------------|----------------|----|-------------|---------|---------|-----------|
| Mean vs Total      | 18394.68       | 1  | 18394.68    |         |         |           |
| Linear vs Mean     | 18.10          | 2  | 9.05        | 4.00    | 0.0530  |           |
| 2FI vs Linear      | 0.1225         | 1  | 0.1225      | 0.0490  | 0.8298  |           |
| Quadratic vs 2FI   | 18.47          | 2  | 9.24        | 15.97   | 0.0025  | Suggested |
| Cubic vs Quadratic | 3.17           | 2  | 1.58        | 9.00    | 0.0220  | Aliased   |
| Residual           | 0.8804         | 5  | 0.1761      |         |         |           |
| Total              | 18435.42       | 13 | 1418.11     |         |         |           |

Select the highest order polynomial where the additional terms are significant and the model is not aliased.

# Lack of Fit Tests

| Source     | Sum of Squares | df | Mean Square | F-value | p-value |           |
|------------|----------------|----|-------------|---------|---------|-----------|
| Linear     | 21.92          | 6  | 3.65        | 20.12   | 0.0059  |           |
| 2FI        | 21.80          | 5  | 4.36        | 24.01   | 0.0044  |           |
| Quadratic  | 3.32           | 3  | 1.11        | 6.10    | 0.0566  | Suggested |
| Cubic      | 0.1543         | 1  | 0.1543      | 0.8500  | 0.4087  | Aliased   |
| Pure Error | 0.7261         | 4  | 0.1815      |         |         |           |

The selected model should have insignificant lack-of-fit.

# Model Summary Statistics

| Source    | Std. Dev. | R <sup>2</sup> | Adjusted R <sup>2</sup> | Predicted R <sup>2</sup> | PRESS |           |
|-----------|-----------|----------------|-------------------------|--------------------------|-------|-----------|
| Linear    | 1.50      | 0.4442         | 0.3330                  | -0.0956                  | 44.63 |           |
| 2FI       | 1.58      | 0.4472         | 0.2629                  | -1.0433                  | 83.25 |           |
| Quadratic | 0.7605    | 0.9006         | 0.8296                  | 0.1564                   | 34.37 | Suggested |
| Cubic     | 0.4196    | 0.9784         | 0.9481                  | 0.5339                   | 18.99 | Aliased   |

Focus on the model maximizing the **Adjusted R<sup>2</sup>** and the **Predicted R<sup>2</sup>**.
