# Supplementary material for: Valorization of discarded industrial fish processing wastes for the extraction of gelatin to use as biodegradable fish bait matrix using RSM
Source: PeerJ journal article supplement (doi:10.7717/peerj-matsci.14), 2021-03-23
Supplement: ANOVA_Statistics__-_RSM_II_-Insolubility.pdf [file ANOVA_Statistics__-_RSM_II_-Insolubility.pdf]

**Warning:** The Cubic model is aliased.

## Fit Summary

### Response 2: Insolubility

| Source    | Sequential p-value | Lack of Fit p-value | Adjusted R <sup>2</sup> | Predicted R <sup>2</sup> |           |
|-----------|--------------------|---------------------|-------------------------|--------------------------|-----------|
| Linear    | 0.0002             |                     | 0.7931                  | 0.6142                   | Suggested |
| 2FI       | 0.1596             |                     | 0.8177                  | 0.4106                   |           |
| Quadratic | 0.0173             |                     | 0.9265                  | 0.5669                   | Suggested |
| Cubic     | 0.0001             |                     | 0.9974                  | 0.8733                   | Aliased   |

# Sequential Model Sum of Squares [Type I]

| Source             | Sum of Squares | df | Mean Square | F-value | p-value |           |
|--------------------|----------------|----|-------------|---------|---------|-----------|
| Mean vs Total      | 61117.13       | 1  | 61117.13    |         |         |           |
| Linear vs Mean     | 577.11         | 2  | 288.56      | 24.00   | 0.0002  | Suggested |
| 2FI vs Linear      | 24.90          | 1  | 24.90       | 2.35    | 0.1596  |           |
| Quadratic vs 2FI   | 65.41          | 2  | 32.70       | 7.65    | 0.0173  | Suggested |
| Cubic vs Quadratic | 29.16          | 2  | 14.58       | 95.87   | 0.0001  | Aliased   |
| Residual           | 0.7603         | 5  | 0.1521      |         |         |           |
| Total              | 61814.46       | 13 | 4754.96     |         |         |           |

Select the highest order polynomial where the additional terms are significant and the model is not aliased.

# Lack of Fit Tests

| Source     | Sum of Squares | df | Mean Square | F-value | p-value |
|------------|----------------|----|-------------|---------|---------|
| Linear     | 120.23         | 6  | 20.04       |         |         |
| 2FI        | 95.33          | 5  | 19.07       |         |         |
| Quadratic  | 29.92          | 3  | 9.97        |         |         |
| Cubic      | 0.7603         | 1  | 0.7603      |         |         |
| Pure Error | 0.0000         | 4  | 0.0000      |         |         |

The selected model should have insignificant lack-of-fit.

# Model Summary Statistics

| Source    | Std. Dev. | R <sup>2</sup> | Adjusted R <sup>2</sup> | Predicted R <sup>2</sup> | PRESS  |           |
|-----------|-----------|----------------|-------------------------|--------------------------|--------|-----------|
| Linear    | 3.47      | 0.8276         | 0.7931                  | 0.6142                   | 269.06 | Suggested |
| 2FI       | 3.25      | 0.8633         | 0.8177                  | 0.4106                   | 410.98 |           |
| Quadratic | 2.07      | 0.9571         | 0.9265                  | 0.5669                   | 302.04 | Suggested |
| Cubic     | 0.3900    | 0.9989         | 0.9974                  | 0.8733                   | 88.35  | Aliased   |

Focus on the model maximizing the **Adjusted R<sup>2</sup>** and the **Predicted R<sup>2</sup>**.
