# Supplementary material for: Valorization of discarded industrial fish processing wastes for the extraction of gelatin to use as biodegradable fish bait matrix using RSM
Source: PeerJ journal article supplement (doi:10.7717/peerj-matsci.14), 2021-03-23
Supplement: ANOVA_Statistics_values_-_RSM_1_-Insolubility_ratio.pdf [file ANOVA_Statistics_values_-_RSM_1_-Insolubility_ratio.pdf]

# ANOVA for Quadratic model

## Response 2: Insolubility

| Source         | Sum of Squares | df | Mean Square | F-value | p-value  |             |
|----------------|----------------|----|-------------|---------|----------|-------------|
| Model          | 8600.50        | 9  | 955.61      | 46.26   | < 0.0001 | significant |
| A-Water        | 46.13          | 1  | 46.13       | 2.23    | 0.1787   |             |
| B-Sucrose      | 307.52         | 1  | 307.52      | 14.89   | 0.0062   |             |
| C-Gelatin      | 7498.84        | 1  | 7498.84     | 362.99  | < 0.0001 |             |
| AB             | 9.21           | 1  | 9.21        | 0.4459  | 0.5257   |             |
| AC             | 32.04          | 1  | 32.04       | 1.55    | 0.2531   |             |
| BC             | 23.38          | 1  | 23.38       | 1.13    | 0.3227   |             |
| A <sup>2</sup> | 1.15           | 1  | 1.15        | 0.0559  | 0.8199   |             |
| B <sup>2</sup> | 27.72          | 1  | 27.72       | 1.34    | 0.2847   |             |
| C <sup>2</sup> | 668.09         | 1  | 668.09      | 32.34   | 0.0007   |             |
| Residual       | 144.61         | 7  | 20.66       |         |          |             |
| Lack of Fit    | 139.44         | 3  | 46.48       | 36.00   | 0.0024   | significant |
| Pure Error     | 5.17           | 4  | 1.29        |         |          |             |
| Cor Total      | 8745.11        | 16 |             |         |          |             |

Factor coding is **Coded**.

Sum of squares is **Type III - Partial**

The **Model F-value** of 46.26 implies the model is significant. There is only a 0.01% chance that an F-value this large could occur due to noise.

**P-values** less than 0.0500 indicate model terms are significant. In this case B, C, C<sup>2</sup> are significant model terms. Values greater than 0.1000 indicate the model terms are not significant. If there are many insignificant model terms (not counting those required to support hierarchy), model reduction may improve your model.

The **Lack of Fit F-value** of 36.00 implies the Lack of Fit is significant. There is only a 0.24% chance that a Lack of Fit F-value this large could occur due to noise. Significant lack of fit is bad -- we want the model to fit.

# Fit Statistics

|           |       |                          |         |
|-----------|-------|--------------------------|---------|
| Std. Dev. | 4.55  | R <sup>2</sup>           | 0.9835  |
| Mean      | 45.55 | Adjusted R <sup>2</sup>  | 0.9622  |
| C.V. %    | 9.98  | Predicted R <sup>2</sup> | 0.7439  |
|           |       | Adeq Precision           | 21.1224 |

The **Predicted R<sup>2</sup>** of 0.7439 is not as close to the **Adjusted R<sup>2</sup>** of 0.9622 as one might normally expect; i.e. the difference is more than 0.2. This may indicate a large block effect or a possible problem with your model and/or data. Things to consider are model reduction, response transformation, outliers, etc. All empirical models should be tested by doing confirmation runs.

**Adeq Precision** measures the signal to noise ratio. A ratio greater than 4 is desirable. Your ratio of 21.122 indicates an adequate signal. This model can be used to navigate the design space.

# Model Comparison Statistics

|                   |         |
|-------------------|---------|
| PRESS             | 2239.19 |
| -2 Log Likelihood | 84.64   |
| BIC               | 112.97  |
| AICc              | 141.30  |

# Coefficients in Terms of Coded Factors

| Factor         | Coefficient Estimate | df | Standard Error | 95% CI Low | 95% CI High | VIF    |
|----------------|----------------------|----|----------------|------------|-------------|--------|
| Intercept      | 50.03                | 1  | 2.03           | 45.22      | 54.83       |        |
| A-Water        | -2.40                | 1  | 1.61           | -6.20      | 1.40        | 1.0000 |
| B-Sucrose      | 6.20                 | 1  | 1.61           | 2.40       | 10.00       | 1.0000 |
| C-Gelatin      | 30.62                | 1  | 1.61           | 26.82      | 34.42       | 1.0000 |
| AB             | 1.52                 | 1  | 2.27           | -3.86      | 6.89        | 1.0000 |
| AC             | -2.83                | 1  | 2.27           | -8.20      | 2.54        | 1.0000 |
| BC             | -2.42                | 1  | 2.27           | -7.79      | 2.96        | 1.0000 |
| A <sup>2</sup> | 0.5235               | 1  | 2.22           | -4.71      | 5.76        | 1.01   |
| B <sup>2</sup> | 2.57                 | 1  | 2.22           | -2.67      | 7.80        | 1.01   |
| C <sup>2</sup> | -12.60               | 1  | 2.22           | -17.83     | -7.36       | 1.01   |

The coefficient estimate represents the expected change in response per unit change in factor value when all remaining factors are held constant. The intercept in an orthogonal design is the overall average response of all the runs. The coefficients are adjustments around that average based on the factor settings. When the factors are orthogonal the VIFs are 1; VIFs greater than 1 indicate multi-collinearity, the higher the VIF the more severe the correlation of factors. As a rough rule, VIFs less than 10 are tolerable.

## Final Equation in Terms of Coded Factors

Insolubility =

+50.03

-2.40 A

+6.20 B

+30.62 C

+1.52 AB

-2.83 AC

-2.42 BC

+0.5235 A<sup>2</sup>

+2.57 B<sup>2</sup>

-12.60 C<sup>2</sup>

The equation in terms of coded factors can be used to make predictions about the response for given levels of each factor. By default, the high levels of the factors are coded as +1 and the low levels are coded as -1. The coded equation is useful for identifying the relative impact of the factors by comparing the factor coefficients.

## Final Equation in Terms of Actual Factors

Insolubility =

-12.17622

-0.274515 Water

-0.206368 Sucrose

+5.82132 Gelatin

+0.007226 Water \* Sucrose

-0.014513 Water \* Gelatin

-0.013283 Sucrose \* Gelatin

+0.002327 Water<sup>2</sup>

+0.013092 Sucrose<sup>2</sup>

-0.074536 Gelatin<sup>2</sup>

The equation in terms of actual factors can be used to make predictions about the response for given levels of each factor. Here, the levels should be specified in the original units for each factor. This equation should not be used to determine the relative impact of each factor because the coefficients are scaled to accommodate the units of each factor and the intercept is not at the center of the design space.
