# Supplementary material for: Valorization of discarded industrial fish processing wastes for the extraction of gelatin to use as biodegradable fish bait matrix using RSM
Source: PeerJ journal article supplement (doi:10.7717/peerj-matsci.14), 2021-03-23
Supplement: ANOVA_Statistics_values_-_RSM_II_-Gel_strength.pdf [file ANOVA_Statistics_values_-_RSM_II_-Gel_strength.pdf]

**Warning:** The Cubic model is aliased.

## Fit Summary

### Response 1: Gel strength

| Source    | Sequential p-value | Lack of Fit p-value | Adjusted R <sup>2</sup> | Predicted R <sup>2</sup> |           |
|-----------|--------------------|---------------------|-------------------------|--------------------------|-----------|
| Linear    | < 0.0001           | < 0.0001            | 0.8214                  | 0.6187                   |           |
| 2FI       | 0.0018             | < 0.0001            | 0.9366                  | 0.8513                   |           |
| Quadratic | 0.0143             | < 0.0001            | 0.9758                  | 0.8578                   | Suggested |
| Cubic     | 0.0002             | < 0.0001            | 0.9988                  | 0.9436                   | Aliased   |

# Sequential Model Sum of Squares [Type I]

| Source             | Sum of Squares | df | Mean Square | F-value | p-value  |           |
|--------------------|----------------|----|-------------|---------|----------|-----------|
| Mean vs Total      | 703.18         | 1  | 703.18      |         |          |           |
| Linear vs Mean     | 378.25         | 2  | 189.12      | 28.59   | < 0.0001 |           |
| 2FI vs Linear      | 45.01          | 1  | 45.01       | 19.16   | 0.0018   |           |
| Quadratic vs 2FI   | 14.86          | 2  | 7.43        | 8.29    | 0.0143   | Suggested |
| Cubic vs Quadratic | 6.06           | 2  | 3.03        | 70.21   | 0.0002   | Aliased   |
| Residual           | 0.2159         | 5  | 0.0432      |         |          |           |
| Total              | 1147.58        | 13 | 88.28       |         |          |           |

Select the highest order polynomial where the additional terms are significant and the model is not aliased.

# Lack of Fit Tests

| Source     | Sum of Squares | df | Mean Square | F-value   | p-value  |           |
|------------|----------------|----|-------------|-----------|----------|-----------|
| Linear     | 66.16          | 6  | 11.03       | 5.513E+07 | < 0.0001 |           |
| 2FI        | 21.14          | 5  | 4.23        | 2.114E+07 | < 0.0001 |           |
| Quadratic  | 6.28           | 3  | 2.09        | 1.046E+07 | < 0.0001 | Suggested |
| Cubic      | 0.2159         | 1  | 0.2159      | 1.079E+06 | < 0.0001 | Aliased   |
| Pure Error | 8.000E-07      | 4  | 2.000E-07   |           |          |           |

The selected model should have insignificant lack-of-fit.

# Model Summary Statistics

| Source    | Std. Dev. | R <sup>2</sup> | Adjusted R <sup>2</sup> | Predicted R <sup>2</sup> | PRESS  |           |
|-----------|-----------|----------------|-------------------------|--------------------------|--------|-----------|
| Linear    | 2.57      | 0.8511         | 0.8214                  | 0.6187                   | 169.45 |           |
| 2FI       | 1.53      | 0.9524         | 0.9366                  | 0.8513                   | 66.06  |           |
| Quadratic | 0.9470    | 0.9859         | 0.9758                  | 0.8578                   | 63.19  | Suggested |
| Cubic     | 0.2078    | 0.9995         | 0.9988                  | 0.9436                   | 25.08  | Aliased   |

Focus on the model maximizing the **Adjusted R<sup>2</sup>** and the **Predicted R<sup>2</sup>**.
