# Supplementary material for: Valorization of discarded industrial fish processing wastes for the extraction of gelatin to use as biodegradable fish bait matrix using RSM
Source: PeerJ journal article supplement (doi:10.7717/peerj-matsci.14), 2021-03-23
Supplement: Raw_data-StaffSS.xlsx [file Raw_data-StaffSS.xlsx]

## Sheet: Sheet1
	Table 3. Physico-chemical Properties of gelatin from Lethrinus sp
			Lethrinus	Head								Lethrinus	scales
	Ph	Melting point	Bloom strength	Gelling temperature	Yield					Ph	Melting point	Bloom strength	Gelling temperature	Yield
	6.5	22.25	1.202	16	9.25					4.65	28.1	2.0706	19.5	21.1
	6.6	20.11	1.3004	16	12.55					4.3	27.3	1.9703	22.1	22
	4.8	20	1.145	16.5	11.66					4.8	26.5	1.9251	20.8	24.26
Avg	5.96667	20.7867	1.2158	16.1667	11.1533				Avg	4.58333	27.3	1.98867	20.8	22.4533
SD	1.0116	1.26848	0.0786137	0.288675	1.70735				SD	0.25658	0.8	0.0744685	1.3	1.62805
			Lethrinus	skins
												Lethrinus	Fins
	Ph	Melting point	Bloom strength	Gelling temperature	Yield
	4.72	22.45	1.5706	19.9	13.94					Ph	Melting point	Bloom strength	Gelling temperature	Yield
	4.62	25.71	1.5703	17.8	15.56					4.5	26.1	1.0706	15.5	12.19
	4.6	20.31	1.4251	20.8	18.57					4.4	25.24	1.1703	14.1	13.64
Avg	4.64667	22.8233	1.522	19.5	16.0233					4.5	19.3	1.0251	15.5	13.25
SD	0.064291	2.71929	0.083918	1.53948	2.34952				Avg	4.46667	23.5467	1.08867	15.0333	13.0267
									SD	0.057735	3.70277	0.0742668	0.80829	0.750355
Table 3: Physic0-chemical Properties of gelatin from Lutjanus sp
		Lutjanus	Head								Lutjanus	scales
Ph	Melting point	Bloom strength	Gelling temperature	Yield					Ph	Melting point	Bloom strength	Gelling temperature	Yield
6.1	23.18	1.2706	15.9	10.1					5.5	26.7	2.2706	17	20
5.8	20.1	1.3703	16.1	11.15					5.1	26.8	2.3703	16.1	18.87
5.7	22.6	1.3251	16.5	12.11					5.3	27.7	2.3251	17.5	20.6
5.86667	21.96	1.322	16.1667	11.12				Avg	5.3	27.0667	2.322	16.8667	19.8233
0.208167	1.6367	0.0499222	0.305505	1.00534				SD	0.2	0.550757	0.0499222	0.70946	0.878427
		Lutjanus	Skin								Lutjanus	fins
Ph	Melting point	Bloom strength	Gelling temperature	Yield					Ph	Melting point	Bloom strength	Gelling temperature	Yield
4.65	22.6	1.7706	19.2	10.1					4.65	25.4	1.0706	16.2	12.11
4.9	25.1	1.703	17.1	11.15					4.7	21.1	1.037	15.8	11.66
4.8	24.6	1.7251	16.5	12.11					4.8	19.9	1.0251	16.1	12
4.78333	24.1	1.7329	17.6	11.12				Avg	4.71667	22.1333	1.04423	16.0333	11.9233
0.125831	1.32288	0.0344684	1.41774	1.00534				SD	0.0763763	2.89194	0.0235967	0.208167	0.234592

## Sheet: Sheet2
Table 1. Proximate composition of Lethrinus sp raw materials
		LETHRINUS	Head							LETHRINUS	Scales
	Moisture	Protein	ASH	Fat					Moisture	Protein	ASH	Fat
	49.73	16.18	18.32	8.75					29.09	17.6	35.32	1.51
	48.06	17.5	17.19	9.28					28.11	16.7	36.6	1.41
	49.13	16.76	19.01	7.95					29.24	16.58	35.14	2.36
Average	48.9733	16.8133	18.1733	8.66				Average	28.8133	16.96	35.6867	1.76
SD	0.845951	0.661614	0.918822	0.669552				SD	0.613705	0.557494	0.796074	0.522015
		LETHRINUS	Skins						LETHRINUS	Fins
	Moisture	Protein	ASH	Fat				Moisture	Protein	ASH	Fat
	49.1	25.9	2.6	7.4				46.71	23.79	21.49	4.01
	49.49	26.76	1.9	6.63				45.58	24.2	21.33	4.89
	48.51	25.69	1.78	6.19				46.03	25.12	19.7	3.15
Average	49.0333	26.1167	2.09333	6.74			Average	46.1067	24.37	20.84	4.01667
SD	0.49339	0.566951	0.442869	0.612454			SD	0.568888	0.681102	0.990505	0.870019
Table 1. Proximate composition of Lutjanus sp raw materials
		Lutjanus	Head						Lutjanus	Scales
	Moisture	Protein	ASH	Fat				Moisture	Protein	ASH	Fat
	55.1	18.58	12.32	6.82				36.41	20.89	33.73	2.21
	53.58	18.35	13.19	8.49				36.71	22.43	33.06	3.33
	54.12	17.64	13.17	7.87				37.03	21.85	34.13	1.73
Average	54.2667	18.19	12.8933	7.72667			Average	36.7167	21.7233	33.64	2.42333
SD	0.770541	0.49	0.496622	0.844176			SD	0.310054	0.777775	0.540648	0.821056
								Lutjanus	Fins
		Lutjanus	Skins
							Moisture	Protein	ASH	Fat
							48.4	16.14	23.85	4.89
	Moisture	Protein	ASH	Fat			48.74	16.11	25.19	3.94
	58.82	24.69	5.23	1.75			47.15	17.19	23.96	4.73
	60.73	25.79	6	3.24		Average	48.0967	16.48	24.3333	4.52
	59.44	25.12	5.96	3.38		SD	0.837277	0.615061	0.743931	0.508626
Average	59.6633	25.2	5.73	2.79
SD	0.974389	0.554346	0.433474	0.903383

## Sheet: Sheet3
Table 2. Proximate composition of Lethrinus fish gelatin
	Lethrinus head
								Lethrinus scales
	Moisture	Protein	Ash	Fat
	9.83	79.82	6.99	4.2				Moisture	Protein	Ash	Fat
	8.15	78.09	7.07	3.34				7.84	83.55	5.09	0.91
	8.96	78.56	6.86	4.16				8.73	84.8	5.18	0.96
Average	8.98	78.8233	6.97333	3.9				9.82	83.6	5.35	1.09
SD	0.840179	0.894558	0.105987	0.485386			Average	8.79667	83.9833	5.20667	0.986667
							SD	0.991682	0.707696	0.132035	0.092916
		LETHRINUS	Skins					LETHRINUS	Fins
	Moisture	Protein	Ash	Fat			Moisture	Protein	Ash	Fat
	8.47	86.6	2.15	1.66			9.93	81.54	5.06	0.41
	8.02	86.2	1.193	1.08			9.56	79.85	4.95	0.9
	9.45	87.16	2.19	1.93			8.89	80.74	4.75	0.93
Average	8.64667	86.6533	1.84433	1.55667		Average	9.46	80.71	4.92	0.746667
SD	0.731186	0.482217	0.564426	0.434319		SD	0.527162	0.845399	0.157162	0.291947

## Sheet: Sheet4
TABLE 2. Proximate composition of Lutjanus fish gelatin
		Lutjanus	Head						Lutjanus	Scales
	Moisture	Protein	ASH	Fat				Moisture	Protein	ASH	Fat
	9.4	81.63	4.88	2.36				8.73	86.11	5.2	0.52
	10.2	82.45	4.07	2.48				8.82	85.03	5.43	0.32
	9.6	83.34	5.75	2.17				8.1	85.04	5.1	1.16
Average	9.73333	82.4733	4.9	2.33667			Average	8.55	85.3933	5.24333	0.666667
SD	0.416333	0.855239	0.840179	0.156312			SD	0.392301	0.620672	0.169214	0.438786
		Lutjanus skins						Lutjanus fins
	Moisture	Protein	ASH	Fat			Moisture	Protein	ASH	Fat
	10.21	84.45	1.15	1.6			10.33	82.5	4.55	2.26
	9.6	85.34	1.38	1.94			9.56	81.49	4.1	3.91
	10.11	84.63	2.76	2.25			9.32	81.55	3.73	3.19
Average	9.97333	84.8067	1.76333	1.93		Average	9.73667	81.8467	4.12667	3.12
SD	0.327159	0.470567	0.870766	0.325115		SD	0.527668	0.566598	0.41065	0.827224

## Sheet: Sheet5
Figure 1. Waste profiling
		Lethrinus
	Meat	Head	Fins	Scales	Viscera
	65.73	23.31	2.82	2.35	5.8
	72.54	16.04	3.38	2.53	5.5
	71.82	14.24	4.89	3.95	5.51
	70.31	15.48	4.79	3.72	5.7
Avg	70.1	17.2675	3.97	3.1375	5.6275
SD	3.05794	4.09795	1.03108	0.814182	0.147281
		Lutjanus
	Meat	Head	Fins	Scales	Viscera
	53.76	25.28	7.96	8.6	4.4
	51.72	26.91	7.93	9.04	4.5
	52.66	25.53	7.11	9.9	4.8
Avg	52.7133	25.9067	7.66667	9.18	4.56667
SD	1.02104	0.877857	0.482321	0.661211	0.208167
Collection of fish wastes:
Length
Lethrinus sp (in cm)	Lutjanus sp (in cm)
34.55	43.8
35.8	42
37.5	42.2
39.45	44.5
38	44.7
35.7	43.15
